# Supplementary material
Source: PubMed Central journal article supplement (PMC4495008)

## Follow-up

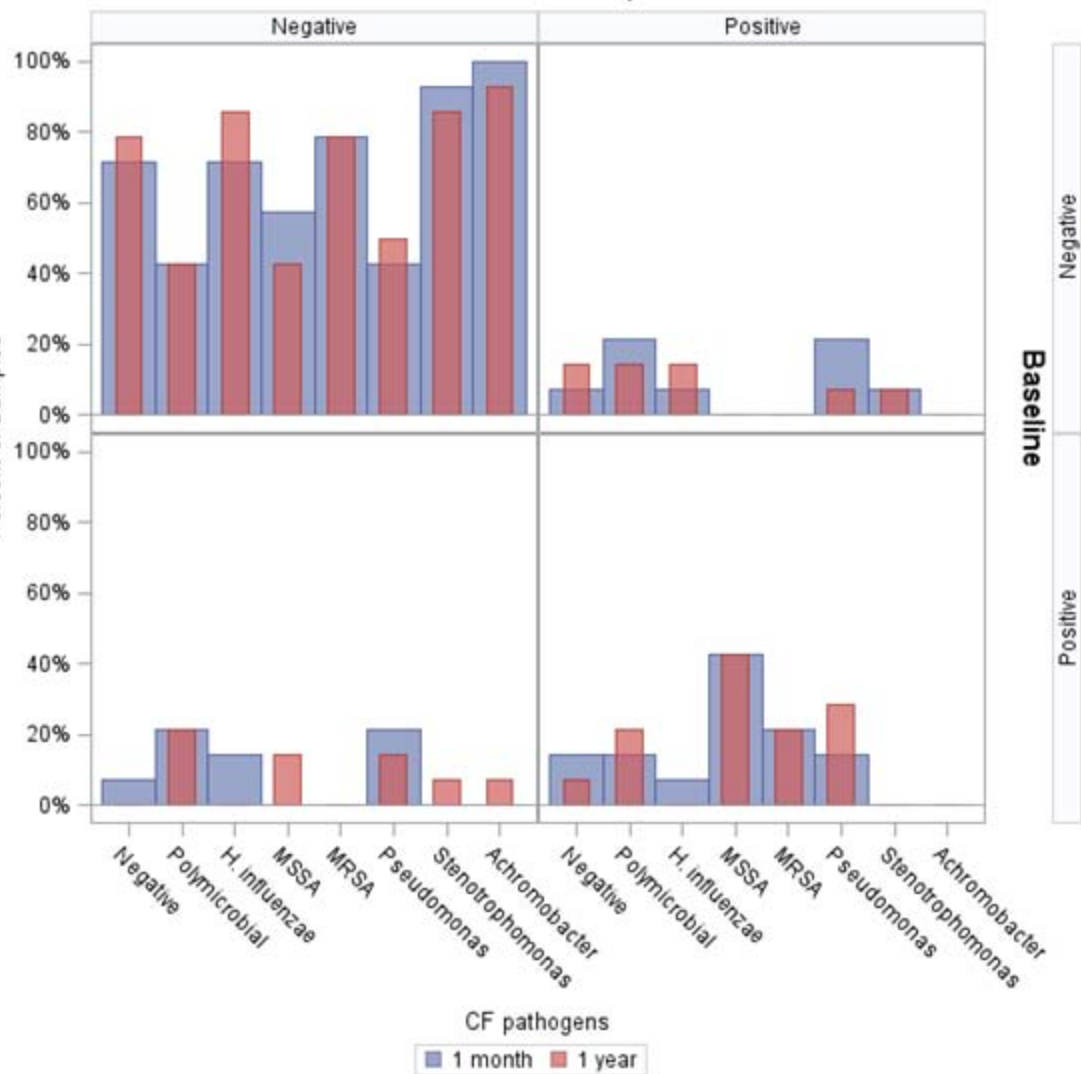

## Follow-up

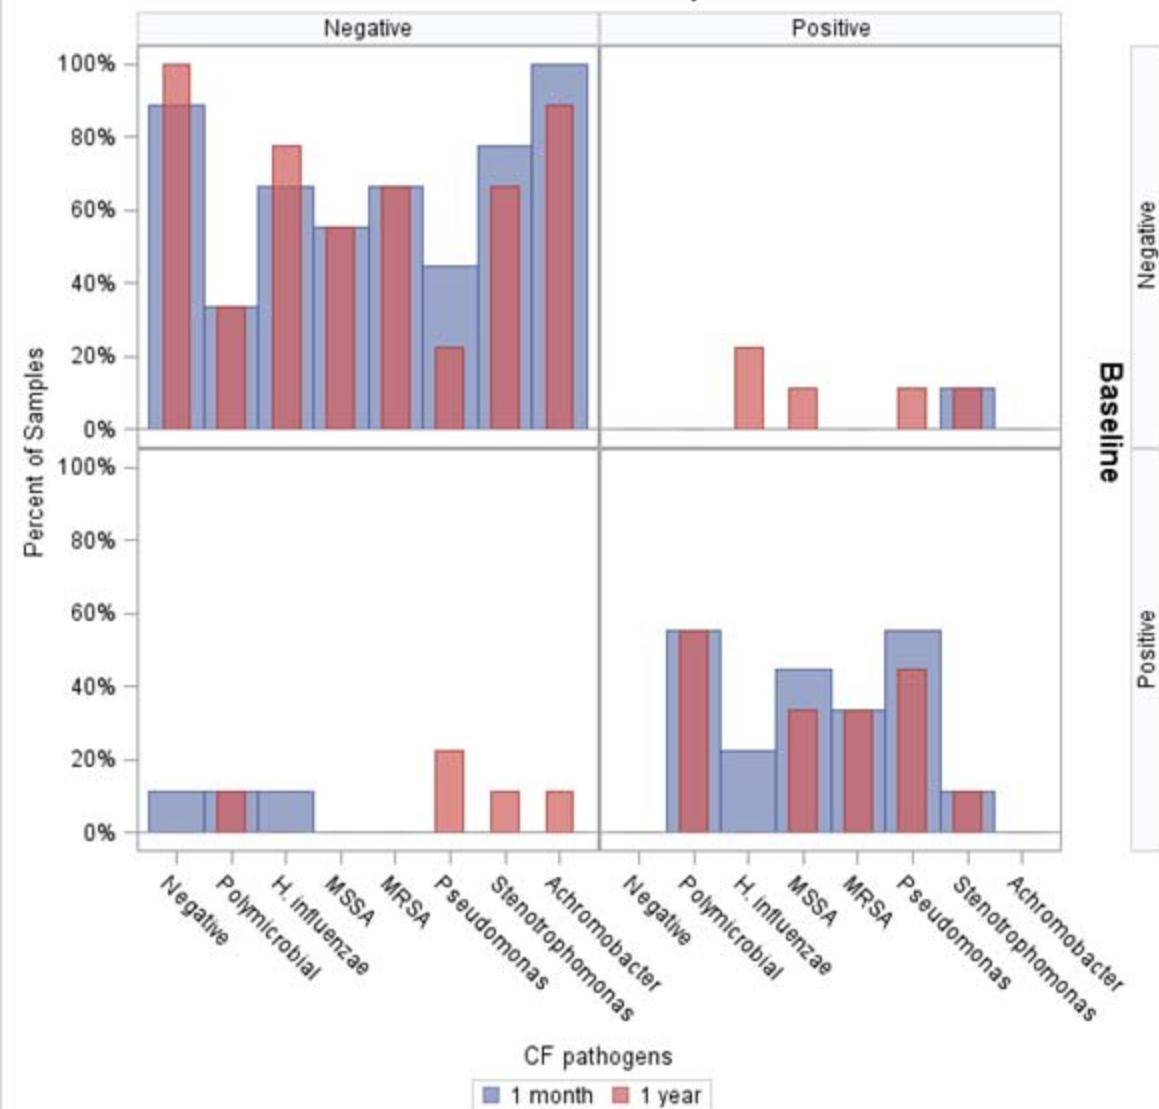

Supplement: NIHMS645325-supplement-Supp_FigureS1-S2.pdf [file NIHMS645325-supplement-Supp_FigureS1-S2.pdf]
